# Supplementary material for: Integrative analysis with ChIP-seq advances the limits of transcript quantification from RNA-seq
Source: HighWire-hosted journal article supplement (doi:10.1101/gr.199174.115), 2016-07-12
Supplement: Supplemental_Data.xlsx [file Supplemental_Data.xlsx]

## Sheet: S1
Supplemental Data S1. Pairs of Isoforms selected from mouse MEL cell line for qRT-PCR validation of fold change under the same condition. In Set I.A, all the 'no peak' isoforms have TPMpRSEM > 1 in both replicates and all three pairs were selected for qRT-PCR validation. In Set I.B, all 'no peak' isoforms have 1 > TPMpRSEM > 0.1 in at least one replicate. Pairs of isoforms in Set I.B are ranked b…
Set	Ensembl 78 ID	GENCODE M4 ID	transcript type	GENCODE M4 Gene ID	Unique exon index	Pol II TSS peak	Replicate 1					Replicate 2
							Fragment count		TPM			Fragment count		TPM
							RSEM	pRSEM	log2(RSEM/pRSEM)	RSEM	pRSEM	RSEM	pRSEM	log2(RSEM/pRSEM)	RSEM	pRSEM
I.A	Dmtn-201	ENSMUST00000022694.11	protein_coding	ENSMUSG 00000022099.12	1	0	330.9	158.75	1.05029	3.5	1.69	507.27	233.54	1.11402	3.42	1.58
	Dmtn-203	ENSMUST00000110984.2	protein_coding		1	1	695.24	870.29	-0.33304	7.24	9.12	1921.26	2196.09	-0.199125	12.77	14.66
	Heatr2-001	ENSMUST00000026975.6	protein_coding	ENSMUSG 00000025857.6	1,2,3,4,5,6,7,10,11,12,13	1	1067.55	1081.99	-0.0283609	13.6	13.87	1992	2010.52	-0.0194483	16.21	16.43
	Heatr2-002	ENSMUST00000127542.1	processed_transcript		1	0	25.45	11.01	1.24387	3.6	1.52	38	19.48	0.991546	3.42	1.72
	Prkci-001	ENSMUST00000108249.4	protein_coding	ENSMUSG 00000037643.10	1,13,14,15,16,17,18	1	820.46	844.94	-0.0524667	7.56	7.84	1080.54	1117.43	-0.0534384	6.36	6.6
	Prkci-002	ENSMUST00000130238.1	protein_coding		1	0	30.45	13.7	1.18976	2.92	1.28	37.07	18.87	1.00631	2.27	1.13
I.B	Rtn4ip1-001	ENSMUST00000054418.7	protein_coding	ENSMUSG 00000019864.9	1,2,3,4	1	626.88	661.63	-0.0870977	9.32	9.9
	Rtn4ip1-002	ENSMUST00000105492.1	protein_coding		1	0	61.12	26.37	1.21525	1.37	0.59
	Dcun1d3-001	ENSMUST00000059851.8	protein_coding	ENSMUSG 00000048787.8	1,3	1	182.58	188.13	-0.0502697	1.41	1.46
	Dcun1d3-005	ENSMUST00000137888.1	protein_coding		1	0	4.69	1.7	1.68013	1.25	0.39
	Etv5-001	ENSMUST00000079601.8	protein_coding	ENSMUSG 00000013089.11	1	1						935.01	1059.93	-0.18741	6.56	7.47
	Etv5-002	ENSMUST00000168774.3	protein_coding		5	0						174.67	51.21	1.77417	1.3	0.38
	Slc14a1-001	ENSMUST00000091813.7	protein_coding	ENSMUSG 00000059336.10	1,9	1						1270.04	1318.07	-0.0597257	9.7	10.11
	Slc14a1-002	ENSMUST00000160292.3	protein_coding		2	1						96.53	118.67	-0.296696	1.27	1.56
	Slc14a1-003	ENSMUST00000160639.1	protein_coding		1	0						94.44	24.26	1.94723	1.35	0.35
	Faim-001	ENSMUST00000035038.3	protein_coding	ENSMUSG 00000032463.6	5	1	528.5	551.48	-0.0702032	25.87	27.16
	Faim-004	ENSMUST00000185472.1	protein_coding		1	0	23.86	2.07	3.54559	2.57	0.22
	Daglb-201	ENSMUST00000045593.10	protein_coding	ENSMUSG 00000039206.12	1,2	1	687.12	779.75	-0.191687	9.43	10.77
	Daglb-001	ENSMUST00000145651.2	protein_coding		13	0	106.68	14.05	2.94939	1.7	0.22
	Elovl5-001	ENSMUST00000034904.9	protein_coding	ENSMUSG 00000032349.9	1,6,7,8	1	3664.73	3696.56	-0.0224967	58.54	59.46
	Elovl5-004	ENSMUST00000133757.3	protein_coding		1	0	33.58	2.3	3.85497	3.04	0.21
	Bpgm-001	ENSMUST00000045372.5	protein_coding	ENSMUSG 00000038871.5	1,3	1						797.05	817.99	-0.042455	10.38	10.69
	Bpgm-005	ENSMUST00000149131.1	protein_coding		1	0						23.5	2.88	3.0773	1.52	0.18
	Blvrb-001	ENSMUST00000037399.11	protein_coding	ENSMUSG 00000040466.11	1,5	1						7262.02	7317.14	-0.0174642	224.98	227.72
	Blvrb-004	ENSMUST00000108357.3	protein_coding		1	0						56.05	3.08	4.14004	2.47	0.14

## Sheet: S2
Supplemental Data S2. qRT-PCR validation results on pairs of isoforms from mouse MEL cell line. No minimium TPM was set because all estimates have average TPMs higher than 10-10.
Method or ID source	Replicate index	Set I.A						Set I.B					Ensembl 78 gene name	Absolute difference of log2(fold change) against qRT-PCR
Ensembl 78		Prkci-001	Prkci-002	Heatr2-001	Heatr2-002	Dmtn-201	Dmtn-203	Rtn4ip1-001	Rtn4ip1-002	Etv5-001	Etv5-002			RSEM	RSEM ML	pRSEM	eXpress	eXpress O1B10	eXpress O1B100
GENCODE M4		ENSMUST 00000108249.4	ENSMUST 00000130238.1	ENSMUST 00000026975.6	ENSMUST 00000127542.1	ENSMUST 00000022694.11	ENSMUST 00000110984.2	ENSMUST 00000054418.7	ENSMUST 00000105492.1	ENSMUST 00000079601.8	ENSMUST 00000168774.3		Prkci	6.93129	6.84445	5.77168	27.7138	24.0382	4.32769
qRT-PCR	1	1	0.00345232	1.07906	0.051711	0.000213965	0.88257	0.325	0.001945	0.580264	0.000259		Heatr2	2.92934	2.87568	1.79034	3.69417	1.06654	3.09188
	2	1.07826	0.00280027	1.12723	0.0341347	0.000722644	1.15091	0.329827	0.016023	0.532104	0.000149		Dmtn	9.38	9.46475	8.04949	11.0977	11.0656	10.994
	3	1.67069	0.00520019	1.79102	0.0377272	0.00102491	1.74567	0.277928	0.012018	0.28973	5.58e-05		Rtn4ip1	2.33691	2.3248	1.51562	5.24835	6.22664	15.4114
	average	1.24965	0.00381759	1.33244	0.041191	0.000653838	1.25972	0.310918	0.00999533	0.467366	0.0001546		Etv5	9.25842	9.06926	8.33769	11.0389	10.7858	10.1191
	log2(fold change)		8.35464		5.0156	10.9119			4.95914		11.5618
RSEM	1	7.56	2.92	13.6	3.6	3.5	7.24	9.32	1.37	8.89	1.83
	2	6.36	2.27	16.21	3.42	3.42	12.77	8.72	1.56	6.56	1.3
	average	6.96	2.595	14.905	3.51	3.46	10.005	9.02	1.465	7.725	1.565
	log2(fold change)		1.42335		2.08625	1.53188			2.62223		2.30337
RSEM ML	1	7.69	2.76	13.69	3.47	3.95	6.9	9.36	1.38	9.17	1.62
	2	6.41	2.19	16.28	3.33	3.33	12.95	8.77	1.54	6.7	1.2
	average	7.05	2.475	14.985	3.4	3.64	9.925	9.065	1.46	7.935	1.41
	log2(fold change)		1.51019		2.13991	1.44713			2.63434		2.49254
pRSEM	1	7.84	1.28	13.87	1.52	1.69	9.12	9.9	0.59	9.35	1.42
	2	6.6	1.13	16.43	1.72	1.58	14.66	9.03	1.15	7.47	0.38
	average	7.22	1.205	15.15	1.62	1.635	11.89	9.465	0.87	8.41	0.9
	log2(fold change)		2.58297		3.22525	2.86239			3.44352		3.22411
eXpress	1	11.8499	3.03e-10	14.8559	1.92e-06	6.5125	5.5583	13.851	0.0226	7.992	5.426
	2	9.9835	0	17.0497	0.0762	9.2365	8.287	12.871	1.95e-08	5.5476	3.9974
	average	10.9167	1.515e-10	15.9528	0.038101	7.8745	6.92265	13.361	0.0113	6.7698	4.7117
	log2(fold change)		36.0684		8.70977	-0.185864			10.2075		0.522866
eXpress O1B10	1	11.9122	3.88e-09	14.875	1.87e-05	6.38182	5.44308	13.7967	0.0114365	8.61478	4.74393
	2	9.96745	0	16.8485	0.46823	9.02683	8.40782	12.844	1.23e-08	5.82311	3.68763
	average	10.9398	1.94e-09	15.8617	0.234124	7.70432	6.92545	13.3204	0.00571823	7.21895	4.21578
	log2(fold change)		32.3928		6.08213	-0.15376			11.1858		0.775988
eXpress O1B100	1	11.7104	1.32783	14.3966	4.40325	6.5349	5.22775	13.7673	1.96e-05	9.94364	3.25566
	2	9.93551	0	16.4927	3.73842	8.43992	8.91843	12.8029	1.95e-10	6.58721	2.82587
	average	10.8229	0.663913	15.4447	4.07084	7.48741	7.07309	13.2851	9.8001e-06	8.26542	3.04076
	log2(fold change)		4.02696		1.92371	-0.0821268			20.3705		1.44265

## Sheet: S3
Supplemental Data S3. Isoforms selected for qRT-PCR validation on fold change of the same isoform under two different conditions.
Set	Ensembl 78 ID	GENCODE M4 ID	log2(RSEMfold_change/pRSEMfold_change)	MEL over MEL DMSO		MEL					MEL DMSO
				Fold change of average TPM		Pol II TSS peak	TPM				Pol II TSS peak	TPM
							Replicate 1		Replicate 2			Replicate 1		Replicate 2
				RSEM	pRSEM		RSEM	pRSEM	RSEM	pRSEM		RSEM	pRSEM	RSEM	pRSEM
II	Ehd1-002	ENSMUST00000148547.1	2.39354	0.246595	0.0469306	0	6.59	1.58	3.91	0.4	1	22.19	21.96	20.39	20.23
	Atf7ip-008	ENSMUST00000186742.1	4.38609	0.414796	0.0198377	0	3.02	0.13	1.97	0.09	1	3.31	2.77	8.72	8.32
				CH12 over MEL		CH12					MEL
	Pafah1b3-007	ENSMUST00000108410.3	2.50976	0.225177	0.0395377	0	2.92	0.59	4.7	0.71	1	11.92	11.05	21.92	21.83
	Ubald2-002	ENSMUST00000144310.1	-4.16196	5.54567	99.2727	1	12.99	12.61	10.08	9.23	0	3	0.17	1.16	0.05
	Ehd1-002	ENSMUST00000148547.1	-2.38586	6.99905	36.5808	1	17.71	16.94	55.78	55.49	0	6.59	1.58	3.91	0.4
	Anpep-002	ENSMUST00000149164.1	4.08009	0.248544	0.0146951	0	1.7	0.09	2.14	0.11	1	9.85	8.79	5.6	4.82
	Atf7ip-008	ENSMUST00000186742.1	-4.4412	7.73347	168	1	14.31	13.6	24.28	23.36	0	3.02	0.13	1.97	0.09
				CH12 over MEL DMSO		CH12					MEL DMSO
	Pafah1b3-007	ENSMUST00000108410.3	2.55725	0.263212	0.0447196	0	2.92	0.59	4.7	0.71	1	17.62	17.79	11.33	11.28
	Limk1-002	ENSMUST00000111233.3	-1.83338	3.15909	11.2581	1	3.07	3.09	3.88	3.89	0	1.19	0.19	1.01	0.43
	Anpep-002	ENSMUST00000149164.1	4.18366	0.285502	0.0157109	0	1.7	0.09	2.14	0.11	1	10.55	10.18	2.9	2.55
	Jdp2-202	ENSMUST00000171754.2	-2.22972	14.1139	66.2	1	20.02	20.21	19.64	19.51	0	1.43	0.44	1.38	0.16

## Sheet: S4
Supplemental Data S4. qRT-PCR validation results on the expression fold change for mouse isoforms under two different conditions. Average TPM that is less than 10-10 was set to 10-10 to avoid taking logirithm on zero or extremely large fold change caused by unrealistically small numbers.
Measured relative expression level or predicted TPM
Method or ID source	Condition	Replicate index	Isoform
Ensembl 78			Atf7ip-008	Anpep-002	Limk1-002	Jdp2-202
GENCODE M4			ENSMUST 00000186742.1	ENSMUST 00000149164.1	ENSMUST 00000111233.3	ENSMUST 00000171754.2
qRT-PCR	CH12	1	1.09066	0.0270571	0.916371	0.787946
		2	0.657459	0.0138357	0.634177	0.377452
		3	0.789629	0.0203717	0.747244	0.497217
		4	0.740568	0.0214988	0.697062	0.548778
		average	0.819579	0.0206908	0.748713	0.552848
	MEL	1	0.0121188	0.155924
		2	0.0184098	0.195237
		3	0.0065599	0.0645069
		4	0.0217276	0.185857
		average	0.014704	0.150381
	MEL DMSO	1	0.149416	0.577964	0.0231087	0.00109544
		2	0.211594	0.879934	0.0283623	0.0393942
		3	0.173284	0.772742	0.0188925	0.00023255
		4	0.306117	1.08407	0.0301502	0.00113184
		average	0.210103	0.828676	0.0251284	0.0104635
RSEM	CH12	1	14.31	1.7	3.07	20.02
		2	24.28	2.14	3.88	19.64
		average	19.295	1.92	3.475	19.83
	MEL	1	3.02	9.85
		2	1.97	5.6
		average	2.495	7.725
	MEL DMSO	1	3.31	10.55	1.19	1.43
		2	8.72	2.9	1.01	1.38
		average	6.015	6.725	1.1	1.405
RSEM ML	CH12	1	12.5	0	3.06	22.15
		2	22.11	0	3.91	21.51
		average	17.305	1e-10	3.485	21.83
	MEL	1	0	7.44
		2	0	3.75
		average	1e-10	5.595
	MEL DMSO	1	1.71	9.43	1.19	2.43
		2	7.65	1.94	0.97	0.34
		average	4.68	5.685	1.08	1.385
pRSEM	CH12	1	13.6	0.09	3.09	20.21
		2	23.36	0.11	3.89	19.51
		average	18.48	0.1	3.49	19.86
	MEL	1	0.13	8.79
		2	0.09	4.82
		average	0.11	6.805
	MEL DMSO	1	2.77	10.18	0.19	0.44
		2	8.32	2.55	0.43	0.16
		average	5.545	6.365	0.31	0.3
eXpress	CH12	1	8.74048	0	2.51064	56.3934
		2	20.9524	0	3.79346	65.233
		average	14.8464	1e-10	3.15205	60.8132
	MEL	1	1.69e-28	5.33
		2	0	2.38
		average	1e-10	3.855
	MEL DMSO	1	1.12	5.51	1.2347	3.48
		2	6.27	1.18977	1.22872e-05	4.87043
		average	3.695	3.34988	0.617357	4.17522
eXpress O1B10	CH12	1	12.1046	0	2.4027	53.5021
		2	19.5963	0	3.59818	65.3418
		average	15.8505	1e-10	3.00044	59.422
	MEL	1	3.37e-34	5.39341
		2	0	2.35396
		average	1e-10	3.87369
	MEL DMSO	1	2.47315	5.4011	1.07914	3.54622
		2	8.00962	1.3517	1.41e-05	5.0155
		average	5.24138	3.3764	0.539579	4.28086
eXpress O1B100	CH12	1	12.0461	0	2.20447	52.5597
		2	19.5086	0	3.41497	65.4696
		average	15.7773	1e-10	2.80972	59.0147
	MEL	1	9.71e-86	5.36303
		2	0	2.34746
		average	1e-10	3.85524
	MEL DMSO	1	2.12591	5.3801	0.597927	3.5958
		2	7.73701	1.34864	2.25e-05	5.12202
		average	4.93146	3.36437	0.298975	4.35891
log2(fold change) of average relative expression level or TPM										Absolute difference of log2(fold change)
Isoform	Condition 1	Condition 2	qRT-PCR	RSEM	RSEM ML	pRSEM	eXpress	eXpress O1B10	eXpress O1B100	RSEM over qRT-PCR	RSEM ML over qRT-PCR	pRSEM over qRT-PCR	eXpress over qRT-PCR	eXpress O1B10 over qRT-PCR	eXpress O1B100 over qRT-PCR
Atf7ip-008	MEL DMSO	MEL	3.83681	1.26952	35.4458	5.65561	35.1049	35.6092	35.5213	2.56729	31.609	1.8188	31.268	31.7724	31.6845
	CH12		5.8006	2.95112	37.3324	7.39232	37.1113	37.2057	37.1991	2.84948	31.5318	1.59172	31.3107	31.4051	31.3985
Anpep-002	MEL	CH12	2.86156	2.00843	35.7034	6.08852	35.166	35.173	35.1661	0.853133	32.8419	3.22696	32.3045	32.3114	32.3045
	MEL DMSO		5.32375	1.80843	35.7264	5.99209	34.9634	34.9748	34.9696	3.51532	30.4027	0.668343	29.6396	29.651	29.6459
Limk1-002	CH12	MEL DMSO	4.89702	1.65951	1.69013	3.49289	2.35211	2.47527	3.23233	3.23751	3.20689	1.40413	2.54491	2.42175	1.66469
Jdp2-202			5.72345	3.81904	3.97835	6.04876	3.86446	3.79502	3.75904	1.9044	1.74509	0.325314	1.85898	1.92842	1.96441
